# Supplementary material for: Re-Inspection of Small RNA Sequence Datasets Reveals Several Novel Human miRNA Genes
Source: PubMed Central journal article supplement (PMC2881037; doi:10.1371/journal.pone.0010961), 2010-06-04

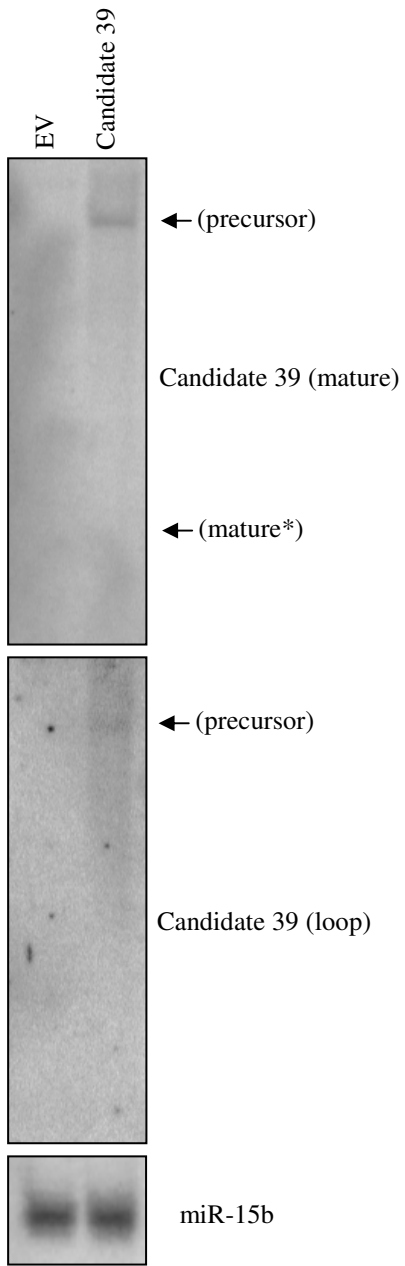

Supplement: pone.0010961.s002.pdf [file pone.0010961.s002.pdf]
